# Supplementary material for: A Bibliometric Analysis of the Global Research in Odonata: Trends and Gaps
Source: MDPI journal article supplement (doi:10.3390/d14121074), 2022-12-05
Supplement: s1 [file s1]

## Supplementary Materials

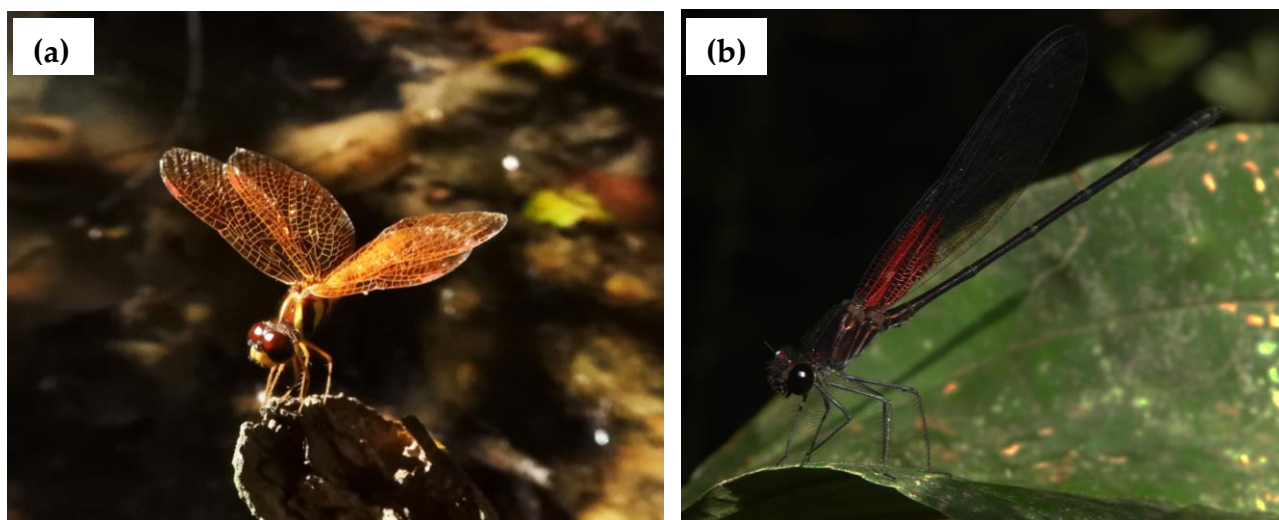

**Figure S1:** Adult specimens of Odonata (Insecta): **(a)** *Perithemis thais* (Anisoptera: Libellulidae); and **(b)** *Hetaerina moribunda* (Zygoptera: Calopterygidae). Source: Cristian C. Mendoza-Penagos.
